# Supplementary material
Source: PubMed Central journal article supplement (PMC6051722)
Supplement: NIHMS967234-supplement-supplement_1.pdf [file NIHMS967234-supplement-supplement_1.pdf]

## Supplemental Material

### Methods

#### Study Population

ARIC is a prospective study of CVD in 15,792 middle-aged adults recruited from four U.S. communities in 1987–1989 (1). The current study was conducted among participants in ARIC visit 4 (1996–1998). Of 11,656 eligible individuals, we excluded those with self-reported race neither white nor black (n=31) and African American participants at the Minnesota and Washington County field centers (n=38) because of small enrollment numbers, individuals missing data for LDL-TG, RLP-C, or other covariates (n=1524), and those with prevalent coronary heart disease (CHD) (n=632) or ischemic stroke (n=97) at visit 4. Therefore, 9334 individuals were included in this analysis (Figure 1).

Prevalent CHD and stroke were defined as self-reported myocardial infarction or stroke before ARIC visit 1; or silent myocardial infarction (diagnosed by electrocardiographic changes), validated myocardial infarction, coronary revascularization, or stroke between ARIC visits 1 and 4. Incident CVD events were a composite of incident CHD and incident ischemic stroke after visit 4 and through December 31, 2013. Methods of assessing incident CHD events and ischemic strokes in ARIC have been described (2,3). Briefly, incident CHD events included fatal CHD, definite or probable myocardial infarction, silent myocardial infarction determined by electrocardiography, and coronary revascularization. Incident stroke events included only ischemic strokes, defined as validated definite or probable hospitalized embolic or thrombotic strokes. The median (25th percentile, 75th percentile) follow-up for CVD, CHD, and ischemic stroke events was 15.6 (10.8, 16.6) years, 15.6 (11.5, 16.6) years, and 15.8 (13.8, 16.7) years,

respectively. The mean follow-up for CVD, CHD, and ischemic stroke events was  $13.3\pm 4.83$  years,  $13.5\pm 4.71$  years, and  $14.2\pm 4.11$  years, respectively.

Medical history, demographic data, anthropometric data, blood pressure measurements, lipid assessments, and blood for RLP-C and LDL-TG measurements were obtained during ARIC visit 4. Research protocols were approved by each field center's institutional review board; all participants provided written informed consent.

### Lipoprotein and Lipid Assays

All lipid measurements were performed in the ARIC lipid laboratory at Baylor College of Medicine. Lipids were measured in 12-hour fasting plasma stored at  $-70^{\circ}\text{C}$  with ethylenediaminetetraacetic acid. Total cholesterol, HDL-C, and TGs were measured using enzymatic measures (4). RLP-C (5) and LDL-TG (6) were determined by fully automated detergent-based homogeneous methods (Denka Seiken, Tokyo, Japan). Interassay coefficients of variation for the RLP-C and LDL-TG assays were 6.8% and 12.0%, respectively. The automated homogeneous LDL-TG method used for our study was validated against the standard sequential density ultracentrifugation method (7).

### Statistical Analysis

Distributions of continuous variables were evaluated for normality. LDL-TG and RLP-C were modeled as both continuous and categorical (quartiles) variables. Associations between both exposure variables and outcomes, including overall CVD and incident CHD or incident ischemic stroke, were determined using Cox proportional-hazards modeling in unadjusted and adjusted models. Linear terms representing quartile number were used to obtain a p-value for trend. The

basic model (model 1) was adjusted for age, gender, and race. Model 2 included all components of model 1 plus traditional cardiovascular risk factors in the Pooled Cohort Risk Equation (8), including total cholesterol, HDL-C, systolic blood pressure, antihypertensive medication use, smoking status (current versus not current), and presence of diabetes (fasting blood glucose  $\geq 126$  mg/dL, nonfasting blood glucose  $\geq 200$  mg/dL, self-reported physician diagnosis, or diabetes medication use). To assess the extent to which LDL-TG provides incremental value in the prediction of future CVD risk beyond circulating TG and apoB levels we used statistical measures of discrimination including the area under the receiver operating characteristic curve (AUC) (9), net reclassification index (NRI), and integrated discrimination index (IDI) (10) to calculate the incremental value of adding the individual lipid measures separately to the PCE model (including all variables of the PCE risk equation) and then all three lipid measures together to the PCE model. Kaplan–Meier survival curves were calculated for each outcome across RLP-C and LDL-TG quartiles. In primary CVD or stroke survival analyses, we assumed that individuals who died of causes other than CVD or stroke were still at risk of developing CVD or a stroke. To address this biologically untenable assumption, we also performed a sensitivity analysis using the Fine and Gray approach to competing risks (11). The results showed that the conventional Kaplan–Meier survival analysis led to overestimation of the event rates compared with the Fine and Gray approach to competing risks.

### Genetic Methods and Analysis

In a targeted gene approach, we investigated candidate genes and well-established variants within those genes (*LPL*, *LIPC*, *LIPG*, *APOC3*, *APOA5*, *ANGPTL3*, and *ANGPTL4*) and *APOE* haplotypes with respect to LDL-TG and RLP-C.

In an unbiased approach, genotypes were obtained from the Illumina HumanExome BeadChip, capturing suggestively functional exonic variants for 8003 European Americans and 2153 African Americans. Associations between RLP-C and LDL-TG levels and nonsynonymous common coding genomic variants (minor allele frequency [MAF] >1%) were evaluated using single-variant analysis and gene-based burden tests, aggregating variants with MAF ≤1%. Only genes with cumulative minor allele count ≥3 in both European Americans and African Americans (13,690 genes) were included in the analysis. Race-specific analyses were performed, followed by a meta-analysis using R seqMeta (12). The inverse variance–weighted fixed effects method was used for the single-variant meta-analyses (13). Gene-based analyses was performed using the T1 count method (12,14). All analyses were adjusted for age, gender, and population stratification (using the first three principal components). In single-variant analysis, associations reaching the predefined threshold of  $2.5 \times 10^{-8}$  (accounting for 1,000,000 independent variants and 2 traits) were considered statistically significant. In gene-based analysis, gene–trait pairs reaching the threshold of  $1.83 \times 10^{-6}$  (accounting for 13,690 genes and 2 traits) were considered statistically significant.

Whole exome sequencing for 5847 European Americans and 1915 African Americans was completed at Baylor College of Medicine Human Genome Sequencing Center (HGSC). Exomes were captured using the HGSC VCRome 2.1 reagent (15) (42Mb, NimbleGen), and all samples were paired-end sequenced using Illumina GAII or HiSeq instruments. Variant calling was done using Atlas2 (16) suite.

Whole exome variants were annotated using ANNOVAR (17) and dbNSFP v2.0 (18) according to the reference genome GRCh37 and National Center for Biotechnology Information RefSeq. Coding variants were annotated to a unique gene as well as to splicing or

nonsynonymous categories for single-variant tests. Detailed methods for sequencing, variant calling, and variant quality control are published (19).

Both exome chip and whole exome sequencing were available in 5767 European Americans and 1857 African Americans. rs2070895 was imputed in ARIC participants using the 1000 Genomes Project reference panel (20,21). The imputation quality was 0.929 and 0.971 for African Americans and European Americans, respectively.

## References

1. ARIC Investigators. The Atherosclerosis Risk in Communities (ARIC) Study: design and objectives. *Am J Epidemiol* 1989;129:687-702.
2. Rosamond WD, Chambless LE, Folsom AR, et al. Trends in the incidence of myocardial infarction and in mortality due to coronary heart disease, 1987 to 1994. *N Engl J Med* 1998;339:861-7.
3. Rosamond WD, Folsom AR, Chambless LE, et al. Stroke incidence and survival among middle-aged adults: 9-year follow-up of the Atherosclerosis Risk in Communities (ARIC) cohort. *Stroke* 1999;30:736-43.
4. Sharrett AR, Patsch W, Sorlie PD, Heiss G, Bond MG, Davis CE. Associations of lipoprotein cholesterol, apolipoproteins A-I and B, and triglycerides with carotid atherosclerosis and coronary heart disease. The Atherosclerosis Risk in Communities (ARIC) Study. *Arterioscler Thromb* 1994;14:1098-104.
5. Ito Y, Hirao Y. Development of a novel homogeneous assay for remnant like particle cholesterol (abstract 484). *Atheroscler Suppl* 2011;12:103.
6. Ito Y, Ohta M. Development of a new homogeneous assay for LDL-triglyceride. *Clin Chem* 2012;58:A29.
7. Ito Y, Ohta M, Ikezaki H, et al. Development and population results of a fully automated homogeneous assay for LDL triglyceride. *J Appl Lab Med* 2018;2:746-756.
8. Goff DC, Jr., Lloyd-Jones DM, Bennett G, et al. 2013 ACC/AHA guideline on the assessment of cardiovascular risk: a report of the American College of Cardiology/American Heart Association Task Force on Practice Guidelines. *J Am Coll Cardiol* 2013;63:2935-59.
9. Pencina MJ, D'Agostino RB, Sr., D'Agostino RB, Jr., Vasan RS. Evaluating the added predictive ability of a new marker: from area under the ROC curve to reclassification and beyond. *Stat Med* 2008;27:157-72; discussion 207-12.
10. Pencina MJ, D'Agostino RB, Steyerberg EW. Extensions of net reclassification improvement calculations to measure usefulness of new biomarkers. *Statistics in Medicine* 2011;30:11-21.
11. Fine JP, Gray RJ. A proportional hazards model for the subdistribution of a competing risk. *J Am Stat Assoc* 1999;94:496-509.
12. Voorman A, Brody J, Chen H, Lumley T, Davis B. Meta-analysis of region-based tests of rare DNA variants. <https://cran.r-project.org/web/packages/seqMeta/seqMeta.pdf>. Accessed 7 July 2017.
13. Borenstein M, Hedges LV, Higgins JP, Rothstein HR. A basic introduction to fixed-effect and random-effects models for meta-analysis. *Res Synth Methods* 2010;1:97-111.
14. Li B, Leal SM. Methods for detecting associations with rare variants for common diseases: application to analysis of sequence data. *Am J Hum Genet* 2008;83:311-21.
15. Bainbridge MN, Wang M, Wu Y, et al. Targeted enrichment beyond the consensus coding DNA sequence exome reveals exons with higher variant densities. *Genome Biol* 2011;12:R68.
16. Challis D, Yu J, Evani US, et al. An integrative variant analysis suite for whole exome next-generation sequencing data. *BMC Bioinformatics* 2012;13:8.
17. Wang K, Li M, Hakonarson H. ANNOVAR: functional annotation of genetic variants from high-throughput sequencing data. *Nucleic Acids Res* 2010;38:e164.

18. Liu X, Jian X, Boerwinkle E. dbNSFP v2.0: a database of human non-synonymous SNVs and their functional predictions and annotations. *Hum Mutat* 2013;34:E2393-402.
19. Morrison AC, Huang Z, Yu B, et al. Practical approaches for whole-genome sequence analysis of heart- and blood-related traits. *Am J Hum Genet* 2017;100:205-215.
20. 1000 Genomes Project Consortium. A global reference for human genetic variation. *Nature* 2015;526:68-74.
21. van Leeuwen EM, Sabo A, Bis JC, et al. Meta-analysis of 49 549 individuals imputed with the 1000 Genomes Project reveals an exonic damaging variant in *ANGPTL4* determining fasting TG levels. *J Med Genet* 2016;53:441-9.

Online Table 1. Common variants (MAF >1%) significantly associated in meta-analysis ( $p \leq 2.5E-8$ )

|             |              |              |            |     | Meta-Analysis |       |          |        | African-Americans |       |          |        | European-Americans |       |          |        |       |               |                    |            |
|-------------|--------------|--------------|------------|-----|---------------|-------|----------|--------|-------------------|-------|----------|--------|--------------------|-------|----------|--------|-------|---------------|--------------------|------------|
| Trait       | Closest Gene | Chr:Position | SNP name   | Ref | Alt           | MAF   | p-value  | Beta   | SE                | MAF   | p-value  | Beta   | SE                 | MAF   | p-value  | Beta   | SE    | Function      | Amino-acid ref/alt | CADD_phred |
| log(LDL-TG) | GCKR         | 2:27730940   | rs1260326  | T   | C             | 0.353 | 8.63E-09 | 0.037  | 0.006             | 0.142 | 0.113701 | 0.031  | 0.020              | 0.409 | 2.99E-08 | 0.037  | 0.007 | splice        | [L X]/[P R]        | 0.108      |
| log(LDL-TG) | APOE         | 19:45412079  | rs7412     | C   | T             | 0.087 | 5.68E-39 | -0.139 | 0.011             | 0.109 | 2.35E-10 | -0.140 | 0.022              | 0.081 | 3.39E-30 | -0.138 | 0.012 | nonsynonymous | R/C                | 30         |
| log(RLPC)   | APOB         | 2:21225281   | rs1042034  | C   | T             | 0.205 | 6.04E-10 | -0.098 | 0.016             | 0.156 | 0.002332 | -0.110 | 0.036              | 0.219 | 6.63E-08 | -0.096 | 0.018 | nonsynonymous | S/N                | 0.005      |
| log(RLPC)   | APOB         | 2:21231524   | rs676210   | G   | A             | 0.204 | 4.83E-10 | -0.099 | 0.016             | 0.156 | 0.001708 | -0.113 | 0.036              | 0.217 | 6.88E-08 | -0.096 | 0.018 | nonsynonymous | P/L                | 27.1       |
| log(RLPC)   | GCKR         | 2:27730940   | rs1260326  | T   | C             | 0.351 | 4.72E-16 | 0.113  | 0.014             | 0.142 | 0.020241 | 0.088  | 0.038              | 0.408 | 5.58E-15 | 0.117  | 0.015 | splice        | [L X]/[P R]        | 0.108      |
| log(RLPC)   | MLXIPL       | 7:73012042   | rs35332062 | G   | A             | 0.114 | 1.52E-10 | -0.130 | 0.020             | 0.072 | 0.230246 | -0.061 | 0.051              | 0.126 | 1.02E-10 | -0.144 | 0.022 | splice        | A/V                | 18.4       |
| log(RLPC)   | MLXIPL       | 7:73020337   | rs3812316  | C   | G             | 0.107 | 5.48E-12 | -0.146 | 0.021             | 0.042 | 0.390677 | -0.057 | 0.067              | 0.125 | 2.92E-12 | -0.156 | 0.022 | nonsynonymous | Q/H                | 19.07      |
| log(RLPC)   | LPL          | 8:19819724   | rs328      | C   | G             | 0.097 | 3.44E-15 | -0.173 | 0.022             | 0.073 | 0.003146 | -0.149 | 0.050              | 0.103 | 2.51E-13 | -0.179 | 0.024 | stop          | S/X                | 43         |
| log(RLPC)   | ZNF259       | 11:116655600 | rs35120633 | G   | A             | 0.058 | 1.11E-25 | 0.289  | 0.028             | 0.026 | 0.000857 | 0.276  | 0.083              | 0.067 | 2.98E-23 | 0.290  | 0.029 | nonsynonymous | A P/V S            | 21.9       |
| log(RLPC)   | APOA5        | 11:116662407 | rs3135506  | G   | C             | 0.065 | 1.93E-25 | 0.271  | 0.026             | 0.058 | 0.001998 | 0.175  | 0.057              | 0.067 | 3.97E-24 | 0.296  | 0.029 | nonsynonymous | S/W                | 25.2       |
| log(RLPC)   | APOE         | 19:45412079  | rs7412     | C   | T             | 0.087 | 2.64E-32 | 0.267  | 0.023             | 0.108 | 6.10E-11 | 0.275  | 0.042              | 0.081 | 6.01E-23 | 0.264  | 0.027 | nonsynonymous | R/C                | 30         |



Online Table 2. T1 results (MAF  $\leq 1\%$ , MAC  $\geq 3$  in both AA and EA) significantly associated in meta-analysis ( $p \leq 1.83E-6$ )

| Trait       | Gene  | Meta-analysis |          |        |       |      |       | African-Americans |          |        |       |      |       | European-Americans |          |        |       |      |       |
|-------------|-------|---------------|----------|--------|-------|------|-------|-------------------|----------|--------|-------|------|-------|--------------------|----------|--------|-------|------|-------|
|             |       | cMAF          | p-value  | Beta   | SE    | cMAC | #SNPs | cMAF              | p-value  | Beta   | SE    | cMAC | #SNPs | cMAF               | p-value  | Beta   | SE    | cMAC | #SNPs |
| log(RLPC)   | APOC3 | 0.0019        | 9.35E-07 | -0.715 | 0.146 | 37   | 3     | 0.0047            | 0.011546 | -0.486 | 0.192 | 20   | 3     | 0.0011             | 4.56E-06 | -1.024 | 0.223 | 17   | 3     |
| log(LDL-TG) | TARM1 | 0.0003        | 4.04E-07 | -0.939 | 0.185 | 20   | 1     | 0.0036            | 0.376152 | 0.096  | 0.108 | 15   | 2     | 0.0003             | 4.04E-07 | -0.939 | 0.185 | 5    | 1     |

Online Table 3. Rare nonsynonymous and splicing exonic variants in TARM1 and APOC3.

|             |       |              |             |     | Meta-Analysis |        |          |        |       | African-Americans |        |          |        |       | European-Americans |        |          |        |       |     |               |                    |            |
|-------------|-------|--------------|-------------|-----|---------------|--------|----------|--------|-------|-------------------|--------|----------|--------|-------|--------------------|--------|----------|--------|-------|-----|---------------|--------------------|------------|
| Trait       | Gene  | Chr:Position | SNP name    | Ref | Alt           | MAF    | p-value  | Beta   | SE    | MAC               | MAF    | p-value  | Beta   | SE    | MAC                | MAF    | p-value  | Beta   | SE    | MAC | Function      | Amino-acid ref/alt | CADD_phred |
| log(LDL-TG) | TARM1 | 19:54578196  | rs2361558   | C   | T             | 0.0003 | 4.04E-07 | -0.939 | 0.185 | 5                 | NA     | NA       | NA     | NA    | NA                 | 0.0003 | 4.04E-07 | -0.939 | 0.185 | 5   | nonsynonymous | E/K                | 8.402      |
| log(LDL-TG) | TARM1 | 19:54578328  | rs17305269  | A   | G             | 0.0115 | 0.370159 | -0.025 | 0.027 | 228               | 0.0014 | 0.196382 | 0.235  | 0.182 | 6                  | 0.0142 | 0.269437 | -0.031 | 0.028 | 222 | nonsynonymous | S/P                | 16.61      |
| log(LDL-TG) | TARM1 | 19:54573300  | rs139802953 | C   | T             | 0.0104 | 0.725614 | 0.010  | 0.027 | 206               | 0.0022 | 0.884562 | 0.019  | 0.134 | 9                  | 0.0126 | 0.742774 | 0.009  | 0.028 | 197 | nonsynonymous | R/Q                | 0.039      |
| log(RLPC)   | APOC3 | 11:116701353 | rs76353203  | C   | T             | 0.0005 | 0.014926 | -0.323 | 0.133 | 10                | 0.0005 | 0.066444 | -0.577 | 0.314 | 2                  | 0.0005 | 0.067271 | -0.268 | 0.147 | 8   | stop          | R/X                | 32         |
| log(RLPC)   | APOC3 | 11:116701560 | rs147210663 | G   | A             | 0.0011 | 0.179266 | -0.126 | 0.094 | 21                | 0.0029 | 0.359734 | -0.118 | 0.128 | 12                 | 0.0006 | 0.323477 | -0.136 | 0.138 | 9   | nonsynonymous | A/T                | 23.6       |
| log(RLPC)   | APOC3 | 11:116701613 | rs140621530 | G   | T             | 0.0003 | 0.003655 | -0.520 | 0.179 | 6                 | 0.0012 | 0.004211 | -0.568 | 0.199 | 5                  | 0.0001 | 0.451172 | -0.312 | 0.414 | 1   | splice        | -                  | 25         |

| Online Table 4. Comparisons of PCE model and PCE plus apoB, triglycerides, or LDL-TG with differences in AUC, NRI, and IDI for risk prediction of CVD |                                           |                                            |                                |                             |                             |                             |
|-------------------------------------------------------------------------------------------------------------------------------------------------------|-------------------------------------------|--------------------------------------------|--------------------------------|-----------------------------|-----------------------------|-----------------------------|
|                                                                                                                                                       | C-statistics<br>Primary Model<br>(95% CI) | C-statistics<br>Extended Model<br>(95% CI) | $\Delta$ AUC (95% CI)          | NRI (95% CI)                | Continuous NRI<br>(95% CI)  | IDI (95% CI)                |
| PCE vs PCE+apoB                                                                                                                                       | 0.7196 (0.7098,<br>0.7320)                | 0.7202 (0.7109,<br>0.7321)                 | 0.0007<br>(0.00001,<br>0.0020) | 0.0031 (-0.0127,<br>0.0205) | 0.0976 (0.0156,<br>0.1764)  | 0.0005 (-0.0001,<br>0.0019) |
| PCE vs PCE+log(TG)                                                                                                                                    | 0.7196 (0.7098,<br>0.7320)                | 0.7199 (0.7100,<br>0.7323)                 | 0.0003 (-0.0001,<br>0.0015)    | 0.0030 (-0.0142,<br>0.0208) | 0.0519 (-0.0013,<br>0.1173) | 0.0007 (0.00002,<br>0.0022) |
| PCE vs PCE+log(LDL-TG)                                                                                                                                | 0.7196 (0.7098,<br>0.7320)                | 0.7216 (0.7117,<br>0.7335)                 | 0.0021 (0.0006,<br>0.0041)     | 0.0079 (-0.0106,<br>0.0308) | 0.0801 (0.0116,<br>0.1442)  | 0.0019 (0.0006,<br>0.0041)  |
| PCE+apoB+log(TG) vs<br>PCE+apoB+log(TG)+ log(LDL-TG)                                                                                                  | 0.7209 (0.7119,<br>0.7328)                | 0.7219 (0.7127,<br>0.7347)                 | 0.0010 (0.0001,<br>0.0028)     | 0.0106 (-0.0108,<br>0.0196) | 0.0509 (-0.0081,<br>0.1070) | 0.0009 (0.0001,<br>0.0023)  |
